# Supplementary material
Source: Springer Nature journal article supplement (https://www.springermedizin.de/resource/supplementary/12916_2012_628_MOESM10_ESM.pdf/9597972)
Supplement: MOESM10 [file 9597972]

### **Inclusion criteria**

- Smartphone or tablet app
- Content or tools addressing one or more aspects of asthma diagnosis, management or support as either
  - the sole function; or
  - in a way that means asthma-related elements can be isolated from the rest of the content
- Presenting content in any format
- English language
- Targeted at patients of any age
- Free and paid apps

### **Exclusion criteria**

- Not available through an approved device marketplace
- Explicitly disclaimed use for a health-related purpose
- Could not be downloaded because of country restrictions that prevented access in the United Kingdom
- Could not be used because of technical problems, after two attempts
